# Supplementary material for: Prevalence and Risk Factors of CoronaVac Side Effects: An Independent Cross-Sectional Study among Healthcare Workers in Turkey
Source: J Clin Med. 2021 Jun 15;10(12):2629. doi: 10.3390/jcm10122629 (PMC8232682; doi:10.3390/jcm10122629)
Supplement: Supplementary file 1 [file jcm-10-02629-s001.zip › jcm-1209485-supplementary.pdf]

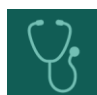

## Supplementary Material

Table S1. OSECV Instrument (in Turkish).

| 1. Demographic Data                                     |                                                                                                                                                                                                                                                                                                                                                                                                                                                                                                                                                                                                                                                                                                                                                                                                                                                  |
|---------------------------------------------------------|--------------------------------------------------------------------------------------------------------------------------------------------------------------------------------------------------------------------------------------------------------------------------------------------------------------------------------------------------------------------------------------------------------------------------------------------------------------------------------------------------------------------------------------------------------------------------------------------------------------------------------------------------------------------------------------------------------------------------------------------------------------------------------------------------------------------------------------------------|
| I. Gender                                               | <ul style="list-style-type: none"><li>○ Female</li><li>○ Male</li><li>○ Non-binary</li><li>○ Prefer not to say</li></ul>                                                                                                                                                                                                                                                                                                                                                                                                                                                                                                                                                                                                                                                                                                                         |
| II. Age                                                 | <ul style="list-style-type: none"><li>○ Dropdown menu with numbers (18-99)</li></ul>                                                                                                                                                                                                                                                                                                                                                                                                                                                                                                                                                                                                                                                                                                                                                             |
| III. Profession                                         | <ul style="list-style-type: none"><li>○ Physician (MD)</li><li>○ Dentist (DDS)</li><li>○ Nurse (BSN)</li><li>○ Midwife</li><li>○ Physiotherapist</li><li>○ If other (<i>please specify</i>)</li></ul>                                                                                                                                                                                                                                                                                                                                                                                                                                                                                                                                                                                                                                            |
| In the case of "Physician (MD)", select your speciality | <ul style="list-style-type: none"><li>○ Allergology</li><li>○ Anaesthetics</li><li>○ Cardiac surgery</li><li>○ Cardiology</li><li>○ Cardio-thoracic surgery</li><li>○ Chemical pathology</li><li>○ Child and adolescent psychiatry</li><li>○ Clinical oncology</li><li>○ Clinical pharmacology and therapeutics</li><li>○ Clinical radiology</li><li>○ Dermato-venereology</li><li>○ Emergency medicine</li><li>○ Endocrinology</li><li>○ Gastroenterology</li><li>○ General (internal) medicine</li><li>○ General psychiatry</li><li>○ General surgery</li><li>○ Geriatric medicine</li><li>○ Haematology</li><li>○ Histopathology</li><li>○ Immunology</li><li>○ Infectious diseases</li><li>○ Maxillo-facial surgery</li><li>○ Medical microbiology and virology</li><li>○ Nephrology</li><li>○ Neurology</li><li>○ Neuropsychiatry</li></ul> |

|                                                                       |                                                                                                                                                                                                                                                                                                                                                                                                                                                                                                                                                                                                                                                                                                                                                                   |
|-----------------------------------------------------------------------|-------------------------------------------------------------------------------------------------------------------------------------------------------------------------------------------------------------------------------------------------------------------------------------------------------------------------------------------------------------------------------------------------------------------------------------------------------------------------------------------------------------------------------------------------------------------------------------------------------------------------------------------------------------------------------------------------------------------------------------------------------------------|
|                                                                       | <input type="radio"/> Neurosurgery<br><input type="radio"/> Nuclear medicine (Radiation Oncology)<br><input type="radio"/> Obstetrics and gynecology<br><input type="radio"/> Occupational medicine<br><input type="radio"/> Ophthalmology<br><input type="radio"/> Orthopedics<br><input type="radio"/> Otolaryngology<br><input type="radio"/> Pediatric surgery<br><input type="radio"/> Pediatrics<br><input type="radio"/> Physiotherapy<br><input type="radio"/> Plastic surgery<br><input type="radio"/> Public health medicine<br><input type="radio"/> Respiratory medicine<br><input type="radio"/> Rheumatology<br><input type="radio"/> Urology<br><input type="radio"/> Vascular surgery<br><input type="radio"/> If other ( <i>please specify</i> ) |
| <b>IV. City</b>                                                       | <input type="radio"/> Istanbul<br><input type="radio"/> Ankara<br><input type="radio"/> Izmir<br><input type="radio"/> If other ( <i>please specify</i> )                                                                                                                                                                                                                                                                                                                                                                                                                                                                                                                                                                                                         |
| <b>V. Working Experience</b>                                          | <input type="radio"/> 1 - 5 years<br><input type="radio"/> 6 - 10 years<br><input type="radio"/> 11 - 20 years<br><input type="radio"/> > 20 years                                                                                                                                                                                                                                                                                                                                                                                                                                                                                                                                                                                                                |
| <b>2. Medical Anamnesis</b>                                           |                                                                                                                                                                                                                                                                                                                                                                                                                                                                                                                                                                                                                                                                                                                                                                   |
| <b>VI. Do you have any chronic disease?</b>                           | <input type="radio"/> Yes<br><input type="radio"/> No                                                                                                                                                                                                                                                                                                                                                                                                                                                                                                                                                                                                                                                                                                             |
| <b>If "Yes", please select at least one option from the following</b> | <input type="radio"/> Asthma<br><input type="radio"/> Blood Disorder<br><input type="radio"/> Bone Disease<br><input type="radio"/> Bowel Disease<br><input type="radio"/> Cancer<br><input type="radio"/> Cardiac Disease<br><input type="radio"/> Chronic Hypertension<br><input type="radio"/> Chronic Obstructive Pulmonary Disease (COPD)<br><input type="radio"/> Diabetes Mellitus<br><input type="radio"/> Renal Disease<br><input type="radio"/> Rheumatoid Arthritis<br><input type="radio"/> If other ( <i>please specify</i> )                                                                                                                                                                                                                        |
| <b>VII. Do you take any medication currently?</b>                     | <input type="radio"/> Yes<br><input type="radio"/> No                                                                                                                                                                                                                                                                                                                                                                                                                                                                                                                                                                                                                                                                                                             |

|                                                                                                                    |                                                                                                                                                                                                                                                                                                                                                                                          |
|--------------------------------------------------------------------------------------------------------------------|------------------------------------------------------------------------------------------------------------------------------------------------------------------------------------------------------------------------------------------------------------------------------------------------------------------------------------------------------------------------------------------|
| <b>VIII. If "Yes", please select at least one option from the following</b>                                        | <input type="radio"/> Antibiotics<br><input type="radio"/> Antidepressants<br><input type="radio"/> Antihistamine<br><input type="radio"/> Immunosuppressive<br><input type="radio"/> Narcotic pain medications<br><input type="radio"/> Seizure medications<br><input type="radio"/> If other ( <i>please specify</i> )                                                                 |
| <b>3. COVID-19-related Anamnesis</b>                                                                               |                                                                                                                                                                                                                                                                                                                                                                                          |
| <b>IX. Vaccination Date (first dose)</b>                                                                           | <input type="radio"/> Please select the date from the (Calendar)                                                                                                                                                                                                                                                                                                                         |
| <b>X. Have you taken the second dose?</b>                                                                          | <input type="radio"/> Yes<br><input type="radio"/> No                                                                                                                                                                                                                                                                                                                                    |
| <b>XI. Vaccine Type</b>                                                                                            | Pfizer-BioNTech COVID-19 Vaccine<br>Moderna COVID-19 Vaccine<br>Oxford–AstraZeneca COVID-19 Vaccine<br>Sinovac Vaccine<br>Janssen Vaccine<br>Sputnik Vaccine                                                                                                                                                                                                                             |
| <b>XII. Have you ever been diagnosed with COVID-19?</b>                                                            | <input type="radio"/> Yes<br><input type="radio"/> No                                                                                                                                                                                                                                                                                                                                    |
| <b>If "Yes", please specify the day when you recovered</b>                                                         | <input type="radio"/> Please select the date from the (Calendar)                                                                                                                                                                                                                                                                                                                         |
| <b>XIII. Have you been exposed to PCR-confirmed COVID-19 cases?</b>                                                | <input type="radio"/> Yes<br><input type="radio"/> No                                                                                                                                                                                                                                                                                                                                    |
| <b>4. Vaccine Side Effects</b>                                                                                     |                                                                                                                                                                                                                                                                                                                                                                                          |
| <b>XIV. Within four weeks of receiving the vaccine, have you suffered from any of the following oral symptoms?</b> | <input type="radio"/> Ulcers<br><input type="radio"/> Vesicles<br><input type="radio"/> Blisters<br><input type="radio"/> A white or red plaque<br><input type="radio"/> Unpleasant mouth odour<br><input type="radio"/> Bleeding gum<br><input type="radio"/> Burning gingiva<br><input type="radio"/> Swelling of the lips<br><input type="radio"/> If other ( <i>please specify</i> ) |
| <b>If "Ulcers", "Vesicles" or "blisters", please choose one location at least</b>                                  | <input type="radio"/> Tongue<br><input type="radio"/> Palate<br><input type="radio"/> Labial or buccal mucosa<br><input type="radio"/> Gingiva<br><input type="radio"/> Lips                                                                                                                                                                                                             |
| <b>If "White or red plaque", please choose one location at least</b>                                               | <input type="radio"/> Tongue dorsum<br><input type="radio"/> Soft palate<br><input type="radio"/> Labial or buccal mucosa                                                                                                                                                                                                                                                                |
| <b>XV. When did the oral symptoms emerge?</b>                                                                      | <input type="radio"/> 1-3 days after vaccination                                                                                                                                                                                                                                                                                                                                         |

|                                                                                                                                                                                                                                           |                                                                                                                                                                                                                                                                                       |
|-------------------------------------------------------------------------------------------------------------------------------------------------------------------------------------------------------------------------------------------|---------------------------------------------------------------------------------------------------------------------------------------------------------------------------------------------------------------------------------------------------------------------------------------|
|                                                                                                                                                                                                                                           | <ul style="list-style-type: none"> <li>○ During 1<sup>st</sup> week of vaccination</li> <li>○ During 2<sup>nd</sup> week of vaccination</li> <li>○ During 3<sup>rd</sup> week of vaccination</li> <li>○ During 4<sup>th</sup> week of vaccination</li> </ul>                          |
| <b>XVI. Within four weeks of receiving the vaccine, have you suffered from any of the following symptoms?</b>                                                                                                                             | <p>Injection site pain</p> <p>Injection site swelling</p> <p>Injection site redness</p> <p>Tiredness</p> <p>Headache</p> <p>Nausea</p> <p>Feeling unwell</p> <p>Muscle Pain</p> <p>Chills</p> <p>Joint Pain</p> <p>Fever</p> <p>Swollen lymph nodes (lymphadenopathy)</p> <p>None</p> |
| <b>XVII. If you chose any of the previous symptoms, please indicate their duration</b>                                                                                                                                                    | <ul style="list-style-type: none"> <li>○ 1 day</li> <li>○ 3 days</li> <li>○ 5 days</li> <li>○ 1 week</li> <li>○ &gt; 1 week</li> <li>○ &gt; 1 month</li> </ul>                                                                                                                        |
| <b>XVIII. Within four weeks of receiving the vaccine, have you suffered from any severe symptom that required hospitalization, e.g., difficulty in breathing, swelling of face or throat, fast heartbeat, fever, or generalized rash?</b> | <ul style="list-style-type: none"> <li>○ Yes</li> <li>○ No</li> </ul>                                                                                                                                                                                                                 |
| <b>XIX. Within four weeks of receiving the vaccine, have you suffered from any of the following cutaneous symptoms?</b>                                                                                                                   | <ul style="list-style-type: none"> <li>○ Rash</li> <li>○ Urticaria</li> <li>○ Angioedema</li> <li>○ If other (<i>please specify</i>)</li> </ul>                                                                                                                                       |
| <b>In the case of "Rash", "Urticaria", or "Angioedema", please select the affected site</b>                                                                                                                                               | <p>Face</p> <p>Upper limb</p> <p>Lower limb</p> <p>Chest / trunk</p> <p>Back</p>                                                                                                                                                                                                      |
